# Supplementary material for: A Novel Module Promotes Horizontal Gene Transfer in Azorhizobium caulinodans ORS571
Source: MDPI journal article supplement (doi:10.3390/genes13101895), 2022-10-19
Supplement: s1 [file s1]

## Supporting Information

**A**

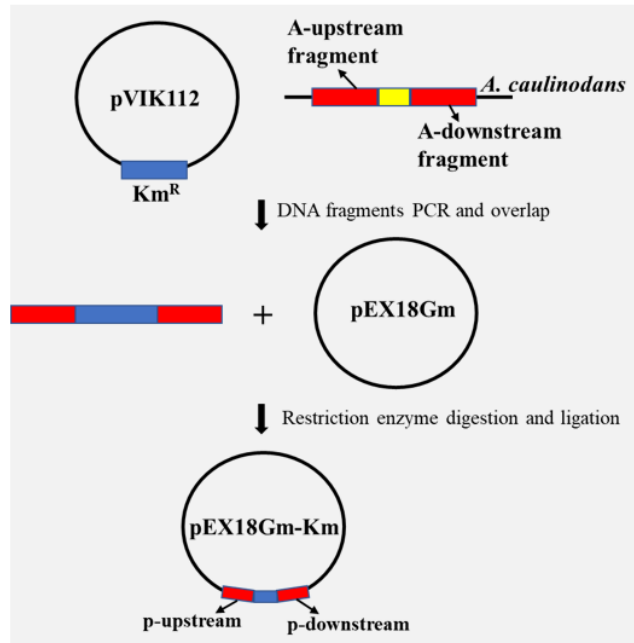

**B**

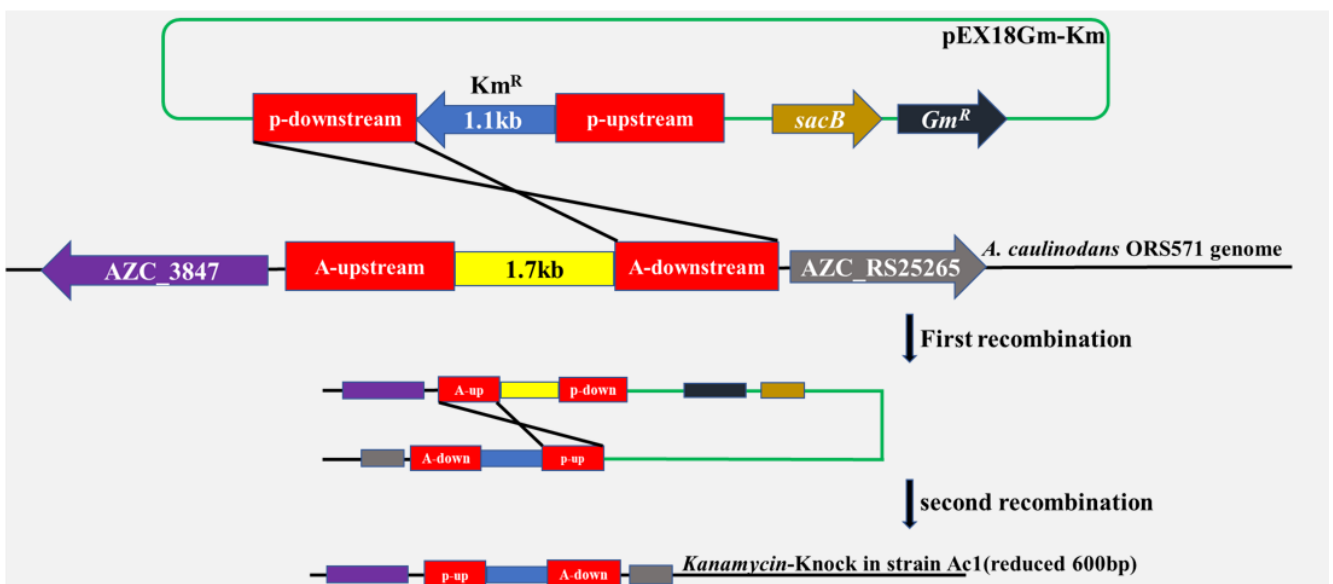

**Figure S1.** Schematic for the construction of gene insertion and knockout. (A) Construction of recombinant plasmid pEX18Gm containing homologous fragments. Using pEX18Gm-Km as an illustration, the fragments were overlapped with each other and inserted into multiple cloning site. (B) Homologous recombination of recombinant plasmid in recipient cell. The software SnapGene was used to create recombinant plasmid flowchart.

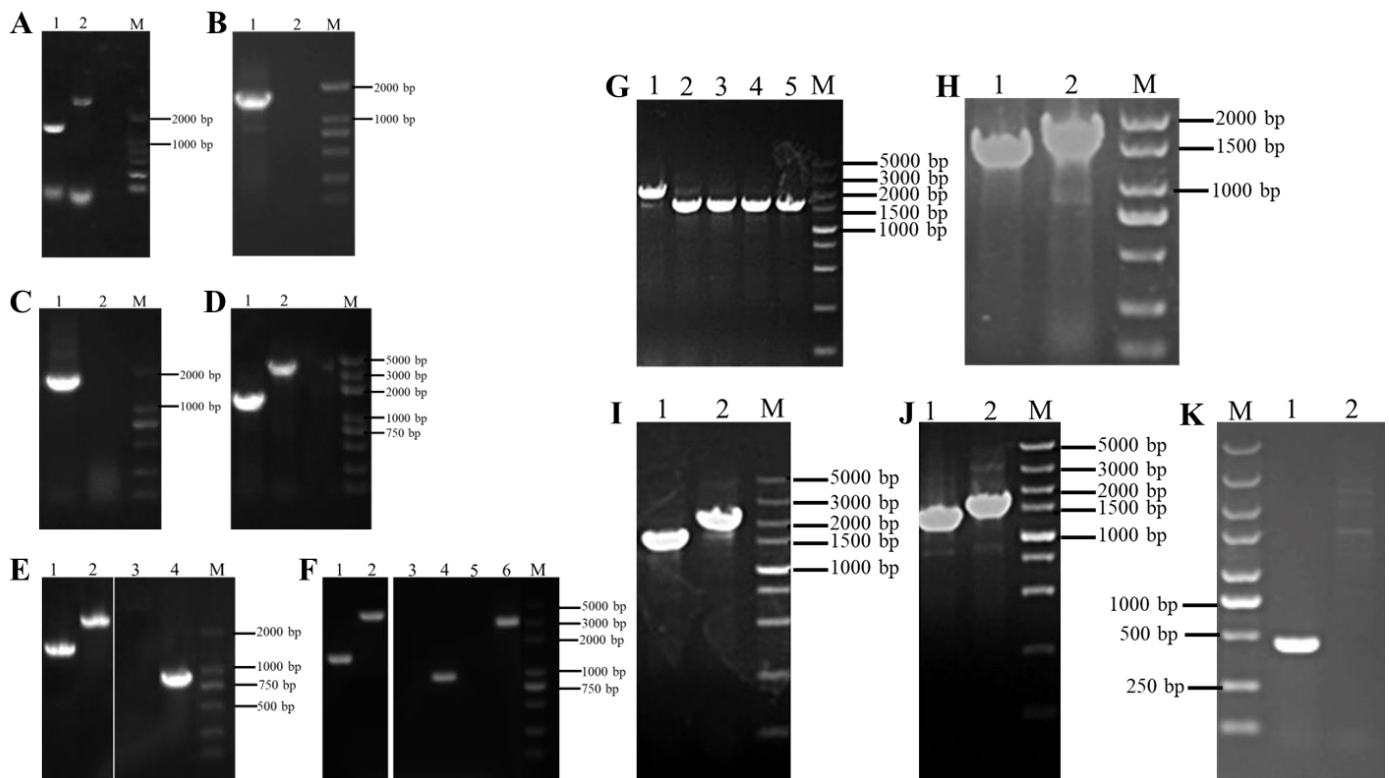

**Figure S2.** Confirmation of mutant strains. (A) Confirmation of *rgf1* in-frame deletion in Azc1 by PCR. Lane 1: Only 1500 bp outside sequence of *rgf1* could be amplified from  $\Delta rgf1$  through primers *Vrgf1*-1 and *Vrgf1*-4. Line 2: The outside sequence and *rgf1* could be amplified together using same primers in Azc1. (B) Confirmation of  $\Delta rgf2$ . Lane 1: Flanking sequence in  $\Delta rgf2$ . Line 2: The complete 4.5 kb fragment of *rgf2* could not be amplified within the 30s PCR extension time using same primers in Azc1. (C) Confirmation of  $\Delta rgf3$ . Lane 1: Flanking sequence of *rgf3* in  $\Delta rgf3$ . Line 2: The 9.2 kb of *rgf3* could not be amplified in Azc1. (D) Confirmation of  $\Delta rgf4$ . Lane 1: Flanking sequence of *rgf4* in  $\Delta rgf4$ . Line 2: The 2.3 kb of *rgf4* in Azc1. (E) Confirmation of  $\Delta rgf12$ . Lane 1: Flanking sequence of *rgf1* in  $\Delta rgf12$ . Line 2: The 1.9 kb *rgf1* in Azc1. Line 3: The internal sequence of *rgf2* was amplified through primers *Vrgf2*-inside-1 and *Vrgf2*-inside-2 in  $\Delta rgf12$ . Line 4: The internal sequence of *rgf2* in Azc1. (F) Confirmation of  $\Delta rgf123$ . Line 1: Flanking sequence of *rgf1* in the mutant. Line 2: 1.9 kb *rgf1* in Azc1. Line 3: The internal sequence of *rgf2* in the mutant. Line 4: The internal sequence of *rgf2* in Azc1. Line 5: The internal sequence of *rgf3*. Line 6: The internal sequence of *rgf3* in Azc1. (G) Confirmation of  $\Delta rihR$ . Line 1: The complete fragment of *rihR* in Azc1. Line 2-5: Flanking sequence of *rihR* in  $\Delta rihR$ . (H) Confirmation of  $\Delta rihR^*$ . Line 1: Flanking sequence of *rihR* in  $\Delta rihR^*$ . Line 2: The fragment of *rihR* in Azc2. (I) Confirmation of  $\Delta rihF1$ . Line 1: Flanking sequence of *rihF1* in the mutant. Line 2: The fragment of *rihF1* in Azc1. (J) Confirmation of  $\Delta rihF2$ . Line 1: Flanking sequence of *rihF2* in the mutant. Line 2: The fragment of *rihF2* in Azc1. (K) Confirmation of  $\Delta ahaR$ . Line 1: The internal sequence of *ahaR* in Azc1. Line 2: The internal sequence of *ahaR* in  $\Delta ahaR$ . M: marker.

**A**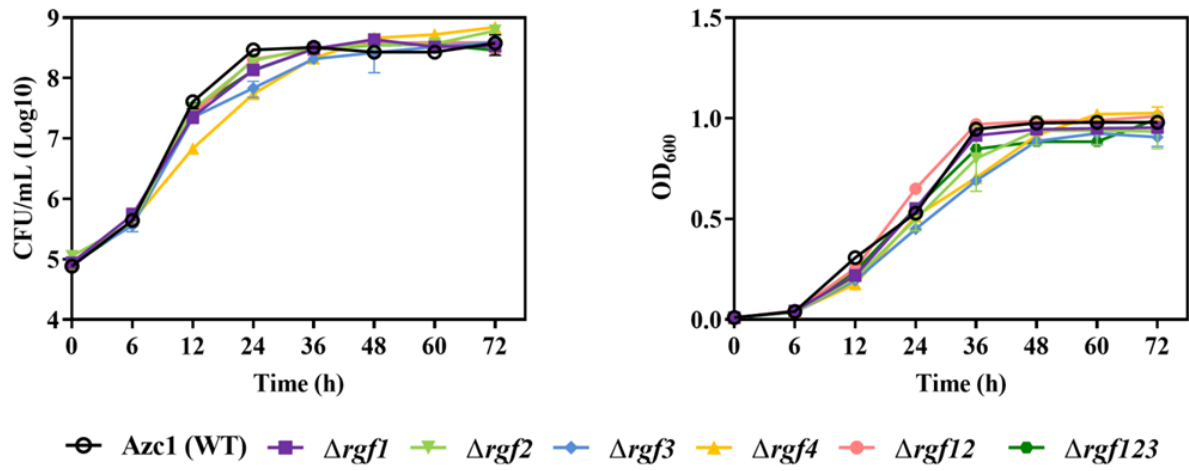**B**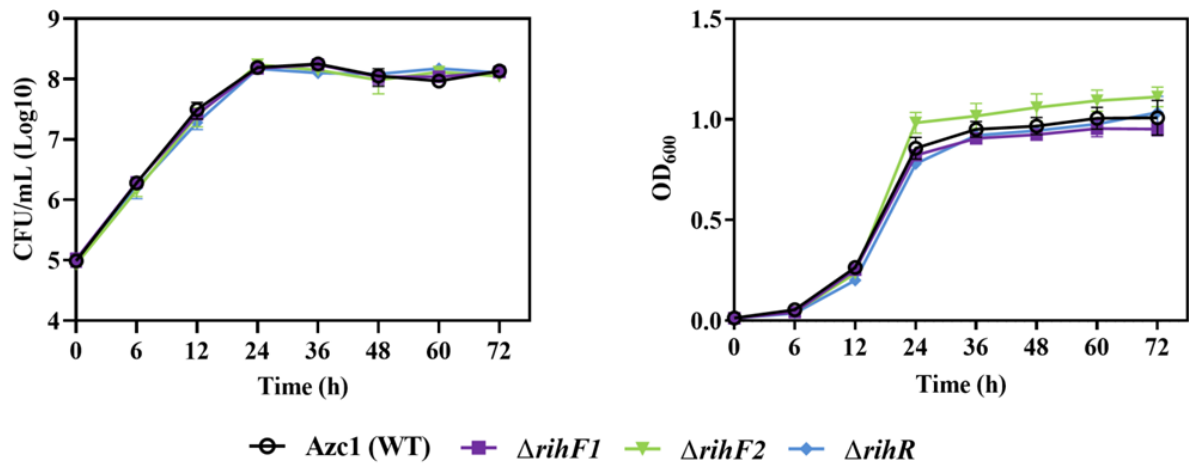**C**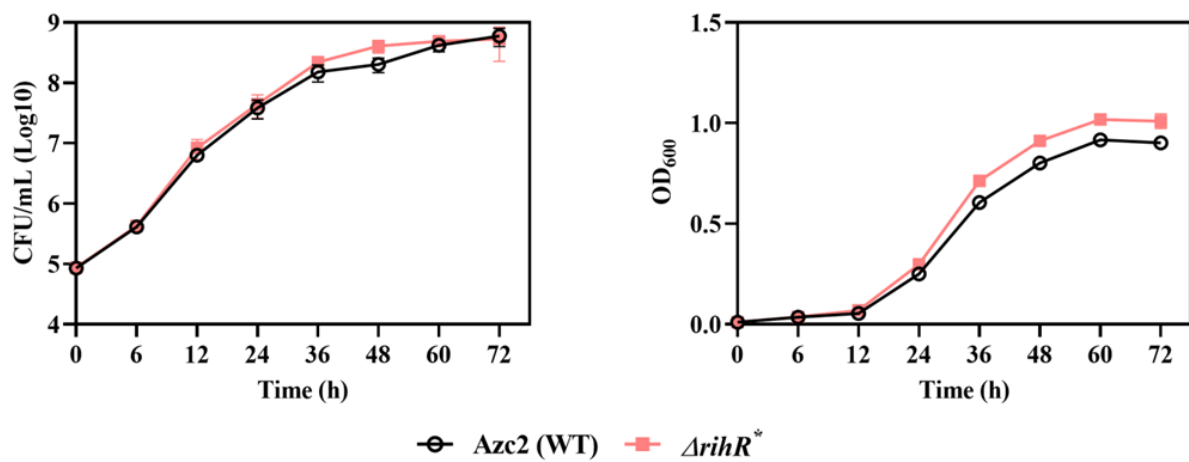

**Figure S3.** Bacterial growth curves of *A. caulinodans* and its derivative strains. (A) The growth curves of *Azc1* and its derivatives. (B) The growth curves of *Azc1* and its derivatives. (C) The growth curves of *Azc2* and its derivative. Strains were grown in TY medium at 28°C, and the cell density was detected at different time points. The experiment was repeated at least three times.

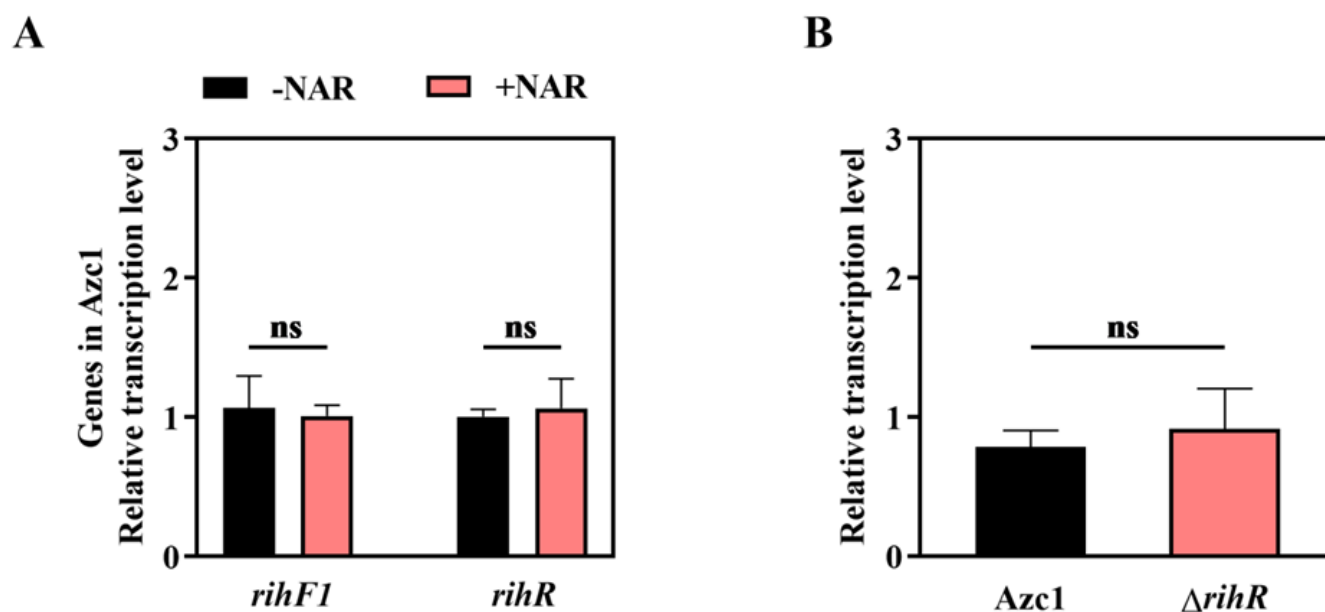

**Figure S4.** qRT-PCR analysis of the transcriptional levels of the *rihF1*, *rihR* and *ahaR*. (A) TranScheme 1. and *rihR* in strain Azc1. TY medium was supplemented with 20  $\mu$ M NAR or not. (B) Transcriptional levels of *ahaR* in strains Azc1 and  $\Delta$ *rihR*. The mid-log growing cells were lysed to extract the RNA of qRT-PCR analysis. 16S rRNA was selected as a reference. Data are mean and SD of three independent experiments. ns: no significant difference.

**Table S1.** Strains and plasmids used in this study.

| Strains or Plasmids              | Relevant characteristics                                                                                                      | Source     |
|----------------------------------|-------------------------------------------------------------------------------------------------------------------------------|------------|
| <i>A. caulinodans</i> strains    |                                                                                                                               |            |
| WT                               | <i>Azorhizobium caulinodans</i> ORS571, Azc0 wild-type, Amp <sup>R</sup>                                                      | [1]        |
| Azc1                             | Derivative of WT, Km resistant gene-knock in, Amp <sup>R</sup> , Km <sup>R</sup>                                              | [2]        |
| Azc2                             | Derivative of WT, Tet resistant gene-knock in, Amp <sup>R</sup> , Tet <sup>R</sup>                                            | This study |
| Azc1 <sup>Vec</sup>              | Derivative of Azc1 carrying on vector pSRKGm, Amp <sup>R</sup> , Km <sup>R</sup> , Gm <sup>R</sup>                            | This study |
| $\Delta$ ahaR                    | Derivative of Azc1 carrying on AZC_3869 in-frame deletion, Amp <sup>R</sup> , Km <sup>R</sup>                                 | This study |
| $\Delta$ rgf1                    | Derivative of Azc1 carrying on 1.9 kb fragment in-frame deletion (AZC_3836 to AZC_3837), Amp <sup>R</sup> , Km <sup>R</sup>   | This study |
| $\Delta$ rgf2                    | Derivative of Azc1 carrying on 4.5 kb fragment in-frame deletion (AZC_3794 to AZC_3800), Amp <sup>R</sup> , Km <sup>R</sup>   | This study |
| $\Delta$ rgf3                    | Derivative of Azc1 carrying on 9.2 kb fragment in-frame deletion (AZC_3841 to AZC_3847), Amp <sup>R</sup> , Km <sup>R</sup>   | This study |
| $\Delta$ rgf4                    | Derivative of Azc1 carrying on 2.3 kb fragment in-frame deletion (AZC_3878 to AZC_3880), Amp <sup>R</sup> , Km <sup>R</sup>   | This study |
| $\Delta$ rgf12                   | Derivative of Azc1 carrying on 6.4 kb fragment in-frame deletion, Amp <sup>R</sup> , Km <sup>R</sup>                          | This study |
| $\Delta$ rgf123                  | Derivative of Azc1 carrying on 15.6 kb fragment in-frame deletion, Amp <sup>R</sup> , Km <sup>R</sup>                         | This study |
| $\Delta$ rihR*                   | Derivative of Azc2, AZC_3881 in-frame deletion mutant, Amp <sup>R</sup> , Tet <sup>R</sup>                                    | This study |
| $\Delta$ rihR                    | Derivative of Azc1, AZC_3881 in-frame deletion mutant, Amp <sup>R</sup> , Km <sup>R</sup>                                     | This study |
| $\Delta$ rihF1                   | Derivative of Azc1, AZC_3879 and AZC_RS26200 double in-frame deletion mutant, Amp <sup>R</sup> , Km <sup>R</sup>              | This study |
| $\Delta$ rihF2                   | Derivative of Azc1, AZC_3880 in-frame deletion mutant, Amp <sup>R</sup> , Km <sup>R</sup>                                     | This study |
| $\Delta$ rihR <sup>Vec</sup>     | Derivative of $\Delta$ rihR carrying on vector pSRKGm, Amp <sup>R</sup> , Km <sup>R</sup> , Gm <sup>R</sup>                   | This study |
| $\Delta$ rihR <sup>C</sup>       | Derivative of $\Delta$ rihR harboring expression plasmid pSRKGm-rihR, Amp <sup>R</sup> , Km <sup>R</sup> , Gm <sup>R</sup>    | This study |
| $\Delta$ rihF1 <sup>Vec</sup>    | Derivative of $\Delta$ rihF1 carrying on vector pSRKGm, Amp <sup>R</sup> , Km <sup>R</sup> , Gm <sup>R</sup>                  | This study |
| $\Delta$ rihF1 <sup>C</sup>      | Derivative of $\Delta$ rihF1 harboring expression plasmid pSRKGm-rihF1, Amp <sup>R</sup> , Km <sup>R</sup> , Gm <sup>R</sup>  | This study |
| $\Delta$ rihF1 ( <i>rihF1a</i> ) | Derivative of $\Delta$ rihF1 harboring expression plasmid pSRKGm-rihF1a, Amp <sup>R</sup> , Km <sup>R</sup> , Gm <sup>R</sup> | This study |
| $\Delta$ rihF1 ( <i>rihF1b</i> ) | Derivative of $\Delta$ rihF1 harboring expression plasmid pSRKGm-rihF1b, Amp <sup>R</sup> , Km <sup>R</sup> , Gm <sup>R</sup> | This study |
| <i>Mesorhizobium huakuii</i> 93  | Derivative of Wild type <i>M. huakuii</i> 93, spontaneous Spe <sup>R</sup>                                                    | [2]        |
| <i>E. coli</i> strains           |                                                                                                                               |            |
| DH5 $\alpha$ $\lambda$ pir       | Host for cloning                                                                                                              | [3]        |
| SM10 $\lambda$ pir               | Host for conjugation                                                                                                          | [4]        |
| BL21 (DE3)                       | Host for protein expression                                                                                                   | [3]        |
| XL1-Blue MRF' Kan                | Host for bacterial one-hybrid assay                                                                                           | [5]        |
| Plasmids                         |                                                                                                                               |            |

---

|                     |                                                                                                    |            |
|---------------------|----------------------------------------------------------------------------------------------------|------------|
| pEX18Gm             | Suicide cloning vector, Gm <sup>R</sup>                                                            | [6]        |
| pSRKGm              | Gene expression vector for genetic complementation,<br>Gm <sup>R</sup>                             | Lab strain |
| pVIK112             | Transcriptional fusion vector, Km <sup>R</sup>                                                     | [7]        |
| pRA302              | Translational fusion vector, Spe <sup>R</sup>                                                      | [8]        |
| pTRG                | The plasmid used for protein expression in bacterial one-<br>hybridization assay, Tet <sup>R</sup> | [9]        |
| pBXcmT              | The plasmid used for DNA cloning in bacterial one-hy-<br>bridization assay, Chl <sup>R</sup>       | [9]        |
| pET-28a             | Protein expression vector, Km <sup>R</sup>                                                         | [10]       |
| pET28a- <i>rihR</i> | Vector for the expression of RihR protein                                                          | This study |

---

**Table S2.** PCR primers used in this study.

| Primer                        | Sequence (5'-3') <sup>a</sup>         | Restriction sites |
|-------------------------------|---------------------------------------|-------------------|
| For deletion and insertion    |                                       |                   |
| Azc2-1                        | AACTGCAGGCGTATAAATATTCAGCAGC          | <i>Pst</i> I      |
| Azc2-2                        | TGTTGGTCGGCGGCCGCGCGGAAACATCTGCCTCACT |                   |
| Azc2-3                        | ATAAGAATGCGGCCGCTATAAAAATAGGCGTATCAC  |                   |
| Azc2-4                        | ATAAGAATGCGGCCGCTTGGGCGCATTTGCGCATTC  |                   |
| Azc2-5                        | TGTTTCCGCGCGGCCGCCGACCAACATCACTCCTGTC |                   |
| Azc2-6                        | CGGAGCTCTCTTTGCGCCGAGCACCTAC          | <i>Sac</i> I      |
| $\Delta$ ahaR-1               | GGGGTACCAGCTCGCCATGGATGATCAG          | <i>Kpn</i> I      |
| $\Delta$ ahaR-2               | AAATGAGAAGCGAGCGTCGAATGTCGTCAC        |                   |
| $\Delta$ ahaR-3               | TCGACGCTCGCTTCTCATTTGCCGGCATGA        |                   |
| $\Delta$ ahaR-4               | TGCTCTAGACATCGTGGGCATAGCCGTCG         | <i>Xba</i> I      |
| $\Delta$ rgf1-1               | CGGAATTCACGCGATGGGTCTTGGAGAG          | <i>Eco</i> RI     |
| $\Delta$ rgf1-2               | AAC TTGGACCGTCTACAATCGAGCCCTATG       |                   |
| $\Delta$ rgf1-3               | GATTGTAGACGGTCCACGTTCCACGGATTG        |                   |
| $\Delta$ rgf1-4               | GCTCTAGAATGTACTGGGAGGCGCCATC          | <i>Xba</i> I      |
| $\Delta$ rgf2-1               | CGGAATTCATCGCTGGTTGCGAGCATAC          | <i>Eco</i> RI     |
| $\Delta$ rgf2-2               | ATCAACCGGTATCCATTGCCTCAGGATGAC        |                   |
| $\Delta$ rgf2-3               | GGCAATGGATAACCGGTTGATCCAGATGTTG       |                   |
| $\Delta$ rgf2-4               | GCTCTAGAGCCCTGATGCTCTGCTTGAC          | <i>Xba</i> I      |
| $\Delta$ rgf3-1               | CGGAATTCCTCCACGTTCCACGGATTG           | <i>Eco</i> RI     |
| $\Delta$ rgf3-2               | CACCTATAACCCCGGTCTATCGCCTCAG          |                   |
| $\Delta$ rgf3-3               | GATAGACCGGGGTATAGGTGCGCGTG            |                   |
| $\Delta$ rgf3-4               | GCTCTAGATGCGCAAATTTCCGAGC             | <i>Xba</i> I      |
| $\Delta$ rgf4-1               | CGGAATTCATCCATTGGAAAGGCGGA            | <i>Eco</i> RI     |
| $\Delta$ rgf4-2               | CATATGACCGGTTGATCCGTGCACC             |                   |
| $\Delta$ rgf4-3               | CGGATCGAACCGGTCATATGACACCGC           |                   |
| $\Delta$ rgf4-4               | CCAAGCTTAGCTGCTCATTCATCTC             | <i>Hind</i> III   |
| $\Delta$ rihR <sup>+</sup> -1 | GCTCTAGAGCCTGACGATCGCCTGGTATTG        | <i>Xba</i> I      |
| $\Delta$ rihR <sup>+</sup> -2 | CTCGGCTGGG CAGACGGATCGCAATTTACG       |                   |
| $\Delta$ rihR <sup>+</sup> -3 | GATCCGTCTGCCCAGCCGAGATGGAATGAG        |                   |
| $\Delta$ rihR <sup>+</sup> -4 | CGGAATTCGCCGGTAAGACTTCGAAAGC          | <i>Eco</i> RI     |
| $\Delta$ rihR-1               | GCTCTAGAGCCTGACGATCGCCTGGTATTG        | <i>Xba</i> I      |
| $\Delta$ rihR-2               | CTCGGCTGGG CAGACGGATCGCAATTTACG       |                   |
| $\Delta$ rihR-3               | GATCCGTCTGCCCAGCCGAGATGGAATGAG        |                   |
| $\Delta$ rihR-4               | CGGAATTCGCCGGTAAGACTTCGAAAGC          | <i>Eco</i> RI     |
| $\Delta$ rihF1-1              | GCTCTAGACGCAGCACCTTACGGAACAG          | <i>Xba</i> I      |
| $\Delta$ rihF1-2              | GTTTGGTTCGCACGACCGTAGCTTCGTCTTC       |                   |
| $\Delta$ rihF1-3              | CTACGGTCGTGCGACCAAACGATGGATTGC        |                   |
| $\Delta$ rihF1-4              | CGGAATTCGCCCTCCGAGATTATCAAC           | <i>Eco</i> RI     |
| $\Delta$ rihF2-1              | GCTCTAGAAACAGGGCTACGGCGATGTC          | <i>Xba</i> I      |
| $\Delta$ rihF2-2              | ACCGGCTACGAGATGCAGTCAGGGCATCAC        |                   |
| $\Delta$ rihF2-3              | GACTGCATCTCGTAGCCGGTGAGTTGGAGG        |                   |
| $\Delta$ rihF2-4              | CGGAATTCCTCAGTCGATCGTCGCAACAC         | <i>Eco</i> RI     |
| For verification of mutants   |                                       |                   |
| Vrgf1-1                       | ACGCGATGGGTCTTGGAGAG                  |                   |
| Vrgf1-4                       | ATGTACTGGGAGGCGCCATC                  |                   |
| Vrgf2-1                       | ATCGCTGGTTGCGAGCATAC                  |                   |

|                                     |                                                       |                 |
|-------------------------------------|-------------------------------------------------------|-----------------|
| <i>Vrgf2</i> -4                     | GCCCTGATGCTCTGCTTGAC                                  |                 |
| <i>Vrgf3</i> -1                     | TCCACGTTCCACGGATTG                                    |                 |
| <i>Vrgf3</i> -4                     | TGCGCAAATTTCCGAGC                                     |                 |
| <i>Vrgf4</i> -1                     | ATCCATTGGAAAGGCGGA                                    |                 |
| <i>Vrgf4</i> -4                     | AGCTGCTCATTCCATCTC                                    |                 |
| <i>Vrgf2</i> -inside-1              | CGGCAAACCTGCTCGAAGCTAGTGAGCAT                         |                 |
| <i>Vrgf2</i> -inside-2              | GACGGAATCGGCGCGGCCA                                   |                 |
| <i>Vrgf3</i> -inside-1              | GGAAGGACGATGGCCGTGGA                                  |                 |
| <i>Vrgf3</i> -inside-2              | TATGCCATCCGTCCGATGCT                                  |                 |
| <i>VrihR</i> -1                     | GCCTGACGATCGCCTGGTATTG                                |                 |
| <i>VrihR</i> -4                     | GCCGGTAAGACTTCGAAAGC                                  |                 |
| <i>VrihR</i> *-1                    | GCCTGACGATCGCCTGGTATTG                                |                 |
| <i>VrihR</i> *-4                    | GCCGGTAAGACTTCGAAAGC                                  |                 |
| <i>VrihF1</i> -1                    | CGCAGCACCTTACGGAACAG                                  |                 |
| <i>VrihF1</i> -4                    | CGCCCTCCGAGATTATCAAC                                  |                 |
| <i>VrihF2</i> -1                    | AACAGGGCTACGGCGATGTC                                  |                 |
| <i>VrihF2</i> -4                    | TCAGTCGATCGTCGCAACAC                                  |                 |
| <i>VahaR</i> -inside-1              | GCAAATCACTGCCGCGTACT                                  |                 |
| <i>VahaR</i> -inside-2              | CACACGCCTTTTATCGCGAT                                  |                 |
| For gene complemen-<br>tary         |                                                       |                 |
| pSRKGm- <i>rihR</i> -F              | <u>GCTCTAGA</u> AAGGGCGTAAATTGCGATCCG                 | <i>Xba</i> I    |
| pSRKGm- <i>rihR</i> -R              | GGGGT <u>ACC</u> ACGACGAGGACGGCAATACC                 | <i>Kpn</i> I    |
| pSRKGm- <i>rihF1</i> -F             | <u>GCTCTAGA</u> CCCTTAGGCAAAGCAATTCC                  | <i>Xba</i> I    |
| pSRKGm- <i>rihF1</i> -R             | GGGGT <u>ACC</u> GCGGAGGATAGGGAAGTTGG                 | <i>Kpn</i> I    |
| pSRKGm- <i>rihF1a</i> -F            | <u>GCTCTAGA</u> AATGGCAGCCGTCAATCCGAT                 | <i>Xba</i> I    |
| pSRKGm- <i>rihF1a</i> -R            | GGGGT <u>ACC</u> CTACGGTCGTGACGATGAC                  | <i>Kpn</i> I    |
| pSRKGm- <i>rihF1b</i> -F            | <u>GCTCTAGA</u> AATGAAGCCGGACACGTCGCG                 | <i>Xba</i> I    |
| pSRKGm- <i>rihF1b</i> -R            | GGGGT <u>ACC</u> TCACCGATGGAGGCGTGAGC                 | <i>Kpn</i> I    |
| For transcriptional fu-<br>sion     |                                                       |                 |
| pVIK112- <i>rihF1</i> -F            | CCCCCGGGAGGGAGGTGACGGTATTTC                           | <i>Sma</i> I    |
| pVIK112- <i>rihF1</i> -R            | GGGGT <u>ACC</u> CTTTGACGAGGCCGATGACC                 | <i>Kpn</i> I    |
| For translational fu-<br>sion       |                                                       |                 |
| pRA302- <i>rihR</i> -F              | GGTACCCGGGGATCCT <u>CTAGAG</u> GCTGTCAAAGATATTACGCGCA | <i>Xba</i> I    |
| pRA302- <i>rihR</i> -R              | AAAACGACGGGATCGAAGCTT <u>CG</u> CATATCCATGCGCAGAC     | <i>Hind</i> III |
| pRA302- <i>intC</i> -F              | CCGGAATTCTGCGCCGAAAGACCTGGTG                          | <i>Eco</i> RI   |
| pRA302- <i>intC</i> -R              | TGCT <u>CTAGAG</u> CGGTACTGCACGATGAAACT               | <i>Xba</i> I    |
| pRA302- <i>ahaR</i> -F              | TGCT <u>CTAGAT</u> CAGAAGATCGACCCGCTTG                | <i>Xba</i> I    |
| pRA302- <i>ahaR</i> -R              | CCCAAGCTT <u>TC</u> GGAAGCGGCCACATGACT                | <i>Hind</i> III |
| For protein expression              |                                                       |                 |
| RihR-pET28a-F                       | CGGAATT <u>TC</u> ATGGATATGCGCAAGCTGGT                | <i>Eco</i> RI   |
| RihR-pET28a-R                       | CCAAGCTT <u>TC</u> AGTCCTTGCCGTCAGGCC                 | <i>Hind</i> III |
| For EMSA                            |                                                       |                 |
| P <sub>intC</sub> -F                | ACATCTGGCTCTGCCGAACC                                  |                 |
| P <sub>intC</sub> -R                | TCCAAACGGCGCTTTGTGAG                                  |                 |
| P <sub>control</sub> -F             | CGGAATTCATCGCGGTGGTATTTTTGCG                          |                 |
| P <sub>control</sub> -R             | GCTCTAGATGACTGAAACGCATCCTCTC                          |                 |
| For bacterial one-hy-<br>brid assay |                                                       |                 |



|                        |                                        |               |
|------------------------|----------------------------------------|---------------|
| pTRG- <i>rihR</i> -F   | <u>CGGGATCC</u> ATGGATATGCGCAAGCTGGT   | <i>Bam</i> HI |
| pTRG- <i>rihR</i> -R   | CCG <u>CTCGAGT</u> CAGTCCTTGCCGTCAGGCC | <i>Xho</i> I  |
| pBXcmT- <i>intC</i> -F | <u>CGGAATTC</u> ACATCTGGCTCTGCCGAACC   | <i>Eco</i> RI |
| pBXcmT- <i>intC</i> -R | GCTCTAGATCCAAACGGCGCTTTGTGAG           | <i>Xba</i> I  |
| For qRT-PCR            |                                        |               |
| <i>qrihF1</i> -F       | GAACCACGCCAGCTATCG                     |               |
| <i>qrihF1</i> -R       | AAGTTTTCCAGGGTTCAGAAG                  |               |
| <i>qrihR</i> -F        | TTCAGCCAGCAGTACATC                     |               |
| <i>qrihR</i> -R        | TGTGCCAGTTCATAGAGC                     |               |
| <i>qahaR</i> -F        | GTACCACCAAAGCACCGACT                   |               |
| <i>qahaR</i> -R        | GCTAGGTCGCGTTTGTCTTC                   |               |

<sup>a</sup>The underline sequence is the restriction site of indicated enzymes.

## References

1. Goethals, K., M. Van Montagu, and M. Holsters, *Conserved motifs in a divergent nod box of Azorhizobium caulinodans* ORS571 reveal a common structure in promoters regulated by LysR-type proteins. *Proc Natl Acad Sci U S A*, 1992. **89**(5): p. 1646-50.
2. Ling, J., et al., *Plant nodulation inducers enhance horizontal gene transfer of Azorhizobium caulinodans symbiosis island*. *Proc Natl Acad Sci U S A*, 2016. **113**(48): p. 13875-13880.
3. Chart, H., et al., *An investigation into the pathogenic properties of Escherichia coli strains BLR, BL21, DH5alpha and EQ1*. *J Appl Microbiol*, 2000. **89**(6): p. 1048-58.
4. Ferrières, L., et al., *Silent mischief: bacteriophage Mu insertions contaminate products of Escherichia coli random mutagenesis performed using suicidal transposon delivery plasmids mobilized by broad-host-range RP4 conjugative machinery*. *J Bacteriol*, 2010. **192**(24): p. 6418-27.
5. Xu, K., et al., *Coordinated control of the type IV pili and c-di-GMP-dependent antifungal antibiotic production in Lysobacter by the response regulator PilR*. *Mol Plant Pathol*, 2021. **22**(5): p. 602-617.
6. Hoang, T.T., et al., *A broad-host-range FLP-FRT recombination system for site-specific excision of chromosomally-located DNA sequences: application for isolation of unmarked Pseudomonas aeruginosa mutants*. *Gene*, 1998. **212**(1): p. 77-86.
7. Kalogeraki, V.S. and S.C. Winans, *Suicide plasmids containing promoterless reporter genes can simultaneously disrupt and create fusions to target genes of diverse bacteria*. *Gene*, 1997. **188**(1): p. 69-75.
8. Jiang, G., et al., *Alkyl hydroperoxide reductase is important for oxidative stress resistance and symbiosis in Azorhizobium caulinodans*. *FEMS Microbiol Lett*, 2019. **366**(3).
9. Guo, M., et al., *Dissecting transcription regulatory pathways through a new bacterial one-hybrid reporter system*. *Genome Res*, 2009. **19**(7): p. 1301-8.
10. Guan, G., et al., *Multiple sequence elements are involved in the transcriptional regulation of the human squalene synthase gene*. *J Biol Chem*, 1997. **272**(15): p. 10295-302.
